# Supplementary material for: In situ one-step synthesis of p-type copper oxide for low-temperature, solution-processed thin-film transistors
Source: Royal Society of Chemistry journal article supplement (doi:10.1039/c7tc00574a), 2017-01-01
Supplement: c7tc00574a1.pdf [file c7tc00574a1.pdf]

## Supplementary Information

### Efficient one-step synthesis of p-type copper oxide for low-temperature, solution-processed thin-film transistors

Ao Liu,<sup>a,b,c</sup> Shengbin Nie,<sup>a,b,c</sup> Guoxia Liu,<sup>a,b,c\*</sup> Huihui Zhu,<sup>c</sup> Chundan Zhu,<sup>a,b,c</sup>  
Byoungchul Shin,<sup>d</sup> Elvira Fortunato,<sup>e</sup> Rodrigo Martins,<sup>e</sup> and Fukai Shan<sup>a,b,c\*</sup>

<sup>a</sup>*College of Physics, Qingdao University, Qingdao 266071, China*

<sup>b</sup>*College of Electronic & Information Engineering, Qingdao University, Qingdao 266071, China*

<sup>c</sup>*Lab of New Fiber Materials and Modern Textile, Growing Base for State Key Laboratory, Qingdao University, Qingdao 266071, China*

<sup>d</sup>*Electronic Ceramics Center, DongEui University, Busan 614-714, Korea*

<sup>e</sup>*Department of Materials Science/CENIMAT-I3N, Faculty of Sciences and Technology, New University of Lisbon and CEMOP-UNINOVA, Campus de Caparica, 2829-516 Caparica, Portugal*

#### Corresponding Author

\* To whom correspondence should be addressed.

E-mail: [gxliu@qdu.edu.cn](mailto:gxliu@qdu.edu.cn); [fukaishan@yahoo.com](mailto:fukaishan@yahoo.com)

---

\* Corresponding author: [gxliu@qdu.edu.cn](mailto:gxliu@qdu.edu.cn); [fukaishan@yahoo.com](mailto:fukaishan@yahoo.com)

**Fabrication of Al<sub>2</sub>O<sub>3</sub> dielectric films and devices.** The Al<sub>2</sub>O<sub>3</sub> precursor solution with a concentration of 0.2 M was prepared by dissolving Al(NO<sub>3</sub>)<sub>3</sub>·9H<sub>2</sub>O in DI water. The precursor solution was spun on the Si substrate at 5000 rpm for 20 s and annealed at 350 °C for 1 h in air. The coating process was repeated twice to achieve an appropriate thickness (30 nm). After that, the CuI precursor solution was spun on the Al<sub>2</sub>O<sub>3</sub>/p<sup>+</sup>-Si substrate. The laminated thin films were then annealed at 250 °C for 1 h. Finally, Ni source and drain electrodes were deposited by thermal evaporation using the same shadow mask.

**The analysis equipments for Al<sub>2</sub>O<sub>3</sub> and Cu<sub>x</sub>O thin films and TFTs.** The thicknesses of CuI, Cu<sub>2</sub>O, and CuO thin films were measured using ellipsometry (ESS01, Sofn Instrument). The crystal structures of Cu<sub>x</sub>O thin films were investigated by X-ray diffractometer (XRD, X'Pert-PRO MPD and MRD, PANalytical, Holland) with a CuK $\alpha$ 1 radiation. The surface morphologies of Cu<sub>x</sub>O thin films were measured by using an atomic force microscope (AFM, SPA-400, Seiko). The chemical compositions of Cu<sub>x</sub>O thin films were analyzed by X-ray photoelectron spectroscopy (XPS, ESCALAB 250). The electrical properties of Al<sub>2</sub>O<sub>3</sub> capacitor and TFTs were investigated by using a semiconductor parameter analyzer (Keithley 2634B) in a dark box.

**The calculation details of device parameters.** The on/off current ratio ( $I_{on}/I_{off}$ ) is defined as the ratio of drain current in the on state ( $I_{on}$ ) to the drain current in the off state ( $I_{off}$ ). The threshold voltage ( $V_{th}$ ) is determined from linear fits to the dependence of the  $I_D^{1/2}$  on  $V_G$ . The subthreshold swing ( $SS$ ) value is defined as the  $V_{DS}$  required to increase the  $I_{DS}$  by one decade.

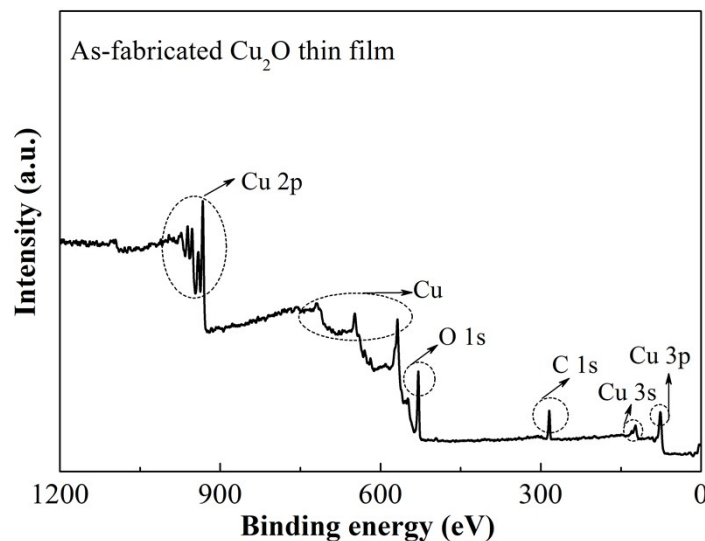

**Fig. S1** XPS spectrum of as-prepared Cu<sub>2</sub>O thin film.

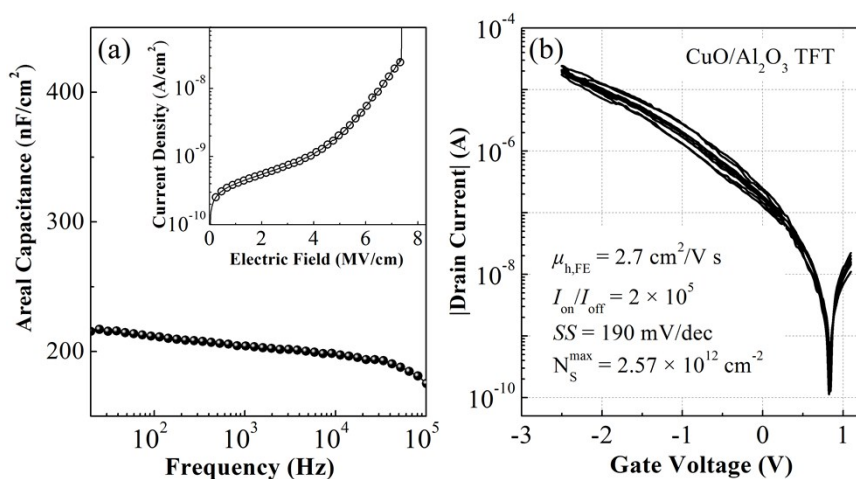

**Fig. S2** (a) Areal capacitance of an Al/Al<sub>2</sub>O<sub>3</sub>/p<sup>+</sup>-Si capacitor as a function of frequency. The leakage-current density versus electric field is shown in the inset. (b) Transfer curves of CuO-250/Al<sub>2</sub>O<sub>3</sub> TFTs.
